# Supplementary material for: Molecular and epidemiological characterization of avian influenza viruses from gulls and dabbling ducks in Norway
Source: PubMed Central journal article supplement (PMC3639200; doi:10.1186/1743-422x-10-112), 2013-04-10
Supplement: 1743-422X-10-112-S2.pdf [file 1743-422X-10-112-S2.pdf]

**Additional file 2 - Table S2. Results from the BLAST similarity searches**

Results from the BLAST similarity searches of the full length nucleotide sequences from the five virus isolates (H3N8, H6N8, H9N2, H13N2 and H16N3) sequenced in this study. Sequence with maximum identities is shown in brackets and is coloured green for Eurasian avian-like and blue for Eurasian gull-like. Gull-like = H13 and H16, Avian-like = all subtypes except H13 and H16.

|              | <b>PB2</b>                                                                   | <b>PB1</b>                                                                   | <b>PA</b>                                                                     | <b>HA</b>                                                                  |
|--------------|------------------------------------------------------------------------------|------------------------------------------------------------------------------|-------------------------------------------------------------------------------|----------------------------------------------------------------------------|
| <b>H3N8</b>  | <b>EU152234 (99)</b><br>A/gull/Moscow/3100/2006<br>(H6N2)                    | <b>CY060292 (99)</b><br>A/mallard/Sweden/48/2002<br>(H11N9)                  | <b>CY049771 (98)</b><br>A/garganey/Altai/1213/2007<br>(H5N2)                  | <b>JF682614 (99)</b><br>A/mallard/Czech<br>Republic/14516/2007<br>(H3N8)   |
| <b>H6N8</b>  | <b>JF789607 (99)</b><br>A/mallard/Czech<br>Republic/13577-24K/2010<br>(H3N8) | <b>DQ251450 (98)</b><br>A/duck/Denmark/65047/04<br>(H5N2)                    | <b>CY060438 (98)</b><br>A/whitefronted<br>goose/Netherlands 2/1999<br>(H6N2)  | <b>CY041402 (99)</b><br>A/mallard/Netherlands/11/2007<br>(H6N5)            |
| <b>H9N2</b>  | <b>HQ244427 (97)</b><br>A/mallard/Czech<br>Republic/15902-17K/2009<br>(H6N2) | <b>GQ240811 (99)</b><br>A/mute<br>swan/Hungary/5973/2007<br>(H7N7)           | <b>JF682620 (99)</b><br>A/mallard/Czech<br>Republic/15902-18K/2009<br>(H11N9) | <b>GU194481 (99)</b><br>A/mallard/Switzerland/WV10708<br>05/2007<br>(H9N2) |
| <b>H13N2</b> | <b>JF775477 (96)</b><br>A/herring<br>gull/Mongolia/454/2008<br>(H13N8)       | <b>GQ907300 (97)</b><br>A/black headed<br>gull/Mongolia/1756/2006<br>(H16N3) | <b>GQ907299 (98)</b><br>A/black headed<br>gull/Mongolia/1756/2006<br>(H16N3)  | <b>GQ907318 (99)</b><br>A/Mongolian<br>gull/Mongolia/405/2007<br>(H13N6)   |
| <b>H16N3</b> | <b>EU030974 (97)</b><br>A/shorebird/Delaware/168/06<br>(H16N3)               | <b>GQ907300 (97)</b><br>A/black headed<br>gull/Mongolia/1756/2006<br>(H16N3) | <b>AY684883 (98)</b><br>A/black-headed<br>gull/Sweden/1/99<br>(H13N6)         | <b>FM179756 (96)</b><br>A/herring<br>gull/Norway/10_1623/2006<br>(H16N3)   |

Table S2 continues

|              | <b>NP</b>                                                                        | <b>NA</b>                                                                | <b>M</b>                                                                 | <b>NS</b>                                                                    |
|--------------|----------------------------------------------------------------------------------|--------------------------------------------------------------------------|--------------------------------------------------------------------------|------------------------------------------------------------------------------|
| <b>H3N8</b>  | <b>CY043835 (99)</b><br>A/mallard/Netherlands/29/2<br>006<br>(H7N2)              | <b>JF682616 (99)</b><br>A/mallard/Czech<br>Republic/14516/2007<br>(H3N8) | <b>GQ404573 (99)</b><br>A/mallard Czech<br>Republic/15307-17/2008        | <b>CY076972 (99)</b><br>A/mallard/Netherlands/20/2005<br>(H12N8)             |
| <b>H6N8</b>  | <b>CY043835 (99)</b><br>(A/mallard/Netherlands/29/2<br>006<br>(H7N2)             | <b>FN773071 (99)</b><br>A/Teal/Norway/10_1575/2007<br>(H3N8)             | <b>GQ404573 (99)</b><br>A/mallard Czech<br>Republic/15307-17/2008        | <b>HQ244411 (99)</b><br>A/Anas crecca/Spain/1460/2008<br>(H7N9)              |
| <b>H9N2</b>  | <b>CY029884 (97)</b><br>A/sharp-tailed<br>sandpiper/Australia/10/2004<br>(H11N9) | <b>HM849013 (98)</b><br>A/mallard/PT/27972-B139/2007<br>(H9N2)           | <b>CY021510 (99)</b><br>A/quail/Italy/4610/2003<br>(H7N2)                | <b>EU580556 (98)</b><br>A/Anas<br>querquedula/Astrakhan/3091/2002<br>(H4N8)  |
| <b>H13N2</b> | <b>GU982292 (98)</b><br>A/great black-headed<br>gull/Atyrau/773/2004<br>(H13N6)  | <b>AJ574903 (96)</b><br>A/Pekin duck/France/92/00<br>(H6N2)              | <b>GQ907319 (99)</b><br>A/Mongolian<br>gull/Mongolia/405/2007<br>(H13N6) | <b>CY077004 (98)</b><br>A/black-headed<br>gull/Sweden/1/2005<br>(H13N8)      |
| <b>H16N3</b> | <b>CY043899 (98)</b><br>A/shorebird/Delaware/224/2<br>006<br>(H13N9)             | <b>CY045385 (95)</b><br>A/shorebird/Delaware/195/2006<br>(H16N3)         | <b>AY684908 (98)</b><br>A/black-headed<br>gull/Sweden/2/99<br>(H16N3)    | <b>GQ907298 (98)</b><br>A/black headed<br>gull/Mongolia/1756/2006<br>(H16N3) |
